# Supplementary material
Source: publisher figshare collection journal article supplement (https://karger.figshare.com/ndownloader/files/26599265)
Supplement: Supplementary file 1 [file 26599265]

**Supplemental Table 1.** Summary assessment of risk of bias for cross-sectional studies using Newcastle-Ottawa scale

|  | **Representativeness of the sample** | **Sample size** | **Non-respondents** | **Ascertainment of the exposure (risk factor)** | **Comparability** | **Assessment of outcome** | **Statistical test** | **Overall** |
| --- | --- | --- | --- | --- | --- | --- | --- | --- |
| Nosrati-Oskouie et al. (2019)[28] | - | * | - | * | ** | ** | * | Good |
| Zabetian-Targhi et al. (2016)[22] | - | * |  | * | ** | ** | * | Good |
| Bienertova-Vasku et al. (2014)[23] | - | - | - | * | ** | * | * | Satisfactory |
| Mirmajidi et al. (2018)[27] | * | * | - | * | ** | ** | * | Good |

“*” indicates low risk of bias; “-” indicates high risk of bias

Very good studies: 9-10 points

Good studies: 7-8 points

Satisfactory studies: 5-6 points

Unsatisfactory studies: 0 to 4 points
